# Supplementary material
Source: HighWire-hosted journal article supplement (https://qdcxjkg.com/highwire/filestream/131553/field_highwire_adjunct_files/2/ERJ-02018-2015_Supplement_tables.pdf)
Supplement: ERJ-02018-2015_Supplement_tables.pdf [file ERJ-02018-2015_Supplement_tables.pdf]

## Supplementary Online Section

**Table S1:** Tabulated demographics and diagnostic information for each semi-structured interviewee

| Participant ID | Patient /parent | Gender of PCD patient | Country     | Diagnosis    | Situs abnormality | Congenital heart defect | Age at testing | Time waiting for results | No. of visits to doctor |
|----------------|-----------------|-----------------------|-------------|--------------|-------------------|-------------------------|----------------|--------------------------|-------------------------|
| 001            | Patient         | Male                  | UK          | Positive     | No                | No                      | >65            | <1 day                   | >40                     |
| 002            | Parent          | Female                | UK          | Positive     | No                | No                      | 5-12           | <6 months                | 21-40                   |
| 003            | Parent          | Male                  | Ireland     | Inconclusive | Yes               | Yes                     | 0-4            | >1 year                  | 0                       |
| 004            | Parent          | Female                | UK          | Positive     | No                | No                      | 0-4            | <1 day                   | 11-20                   |
| 005            | Parent          | Male                  | UK          | Inconclusive | No                | No                      | 0-4            | Still waiting            | 21-40                   |
| 006            | Patient         | Female                | UK          | Positive     | No                | No                      | 36-50          | <6 months                | >40                     |
| 007            | Patient         | Female                | UK          | Negative     | No                | No                      | 51-65          | <6 months                | 1-10                    |
| 008            | Patient         | Male                  | UK          | Inconclusive | No                | No                      | >65            | <1 month                 | 0                       |
| 009            | Patient         | Female                | US          | Positive     | No                | No                      | 36-50          | 6-12 months              | >40                     |
| 010            | Parent          | Female                | UK          | Positive     | No                | No                      | 5-12           | 6-12 months              | >40                     |
| 011            | Patient         | Male                  | Switzerland | Positive     | No                | No                      | 51-65          | >1 year                  | >40                     |
| 012            | Patient         | Female                | Bulgaria    | Probable*    | No                | No                      | 18-35          | >1 year                  | >40                     |
| 013            | Parent          | Female                | Spain       | Positive     | No                | No                      | 5-12           | <6 months                | 21-40                   |
| 014            | Parent          | Male                  | US          | Positive     | No                | No                      | 13-17          | < 1 week                 | 21-40                   |
| 015            | Parent          | Female                | US          | Positive     | Yes               | No                      | 5-12           | <1 year                  | 21-40                   |
| 016            | Patient         | Female                | Canada      | Positive     | No                | No                      | 36-50          | <1 year                  | 0                       |
| 017            | Parent          | Female                | US          | Positive     | Yes               | No                      | 5-12           | 6-12 months              | 1-10                    |

|     |        |        |           |          |     |    |       |           |       |
|-----|--------|--------|-----------|----------|-----|----|-------|-----------|-------|
| 018 | Parent | Female | US        | Positive | No  | No | 18-35 | <1 week   | 0     |
| 019 | Parent | Female | Australia | Positive | Yes | No | 0-4   | <6 months | 0     |
| 020 | Parent | Female | Denmark   | Positive | No  | No | 0-4   | <1 month  | 21-40 |

\*Probable based on doctors assessment but not formally tested

**Table S2:** Comparing age at diagnostic testing, time taken to receive test results, the number of visits to the doctor before referrals, and the type diagnostic tests completed in USA, Germany and UK.

|                                                    | USA<br>Total 66 (100%) | Germany<br>Total 77 (100%) | UK<br>Total 45 (100%) | p-value |
|----------------------------------------------------|------------------------|----------------------------|-----------------------|---------|
| <b>Age at initial testing</b>                      |                        |                            |                       |         |
| <b>&lt; 1 year old</b>                             | 13 (19.7%)             | -                          | 8 (17.8%)             | <0.001  |
| <b>&gt; 1 year old</b>                             | 49 (74.2%)             | 68 (88.3%)                 | 32 (71.1%)            |         |
| <b>Missing</b>                                     | 4 (6.1%)               | 9 (11.6%)                  | 5 (11.1%)             |         |
| Average age at initial testing in years (+/- SD)   | 7.43 years (+/- 8.18)  | 9.86 (+/- 11.63)           | 14.95 (+/- 21.05)     | 0.026   |
| Congenital heart defect                            | 6 (9.1%)               | 6 (7.79%)                  | 9 (20%)               | 0.90    |
| Situs inversus                                     | 30 (45.5%)             | 40 (51.9%)                 | 16 (35.6%)            | 0.17    |
| <b>Number of visits to doctor before diagnosis</b> |                        |                            |                       |         |
| <b>&lt;40 visits</b>                               | 37 (56.1%)             | 50 (64.9%)                 | 34 (75.5%)            | 0.050   |
| <b>≥40 visits</b>                                  | 29 (43.9%)             | 27 (35.1%)                 | 11 (24.4%)            |         |
| <b>Time to diagnosis</b>                           |                        |                            |                       |         |
| <b>&lt;1 month</b>                                 | 21 (31.8%)             | 33 (42.9%)                 | 14 (31.1%)            | 0.195   |
| <b>&gt;1 months</b>                                | 30 (45.5%)             | 26 (33.8%)                 | 21 (46.6%)            |         |
| <b>Missing</b>                                     | 15 (22.7%)             | 18 (23.4%)                 | 10 (22.2%)            |         |
| Diagnostic test: Nno                               | 34 (51.5%)             | 36 (46.8%)                 | 27 (60.0%)            | 0.369   |
| Diagnostic test: nasal scraping                    | 52 (78.8%)             | 58 (75.3%)                 | 41 (91.1%)            | 0.099   |
| Diagnostic test: bronchoscopy                      | 27 (40.9%)             | 39 (50.7%)                 | 5 (11.1%)             | <0.001  |
| Diagnostic test: genetics                          | 38 (57.6%)             | 32 (41.6%)                 | 8 (17.8%)             | <0.001  |
| Diagnostic test: saccharine                        | 4 (6.1%)               | 3 (3.9%)                   | 6 (13.3%)             | 0.132   |
| Diagnostic test: nuclear medicine scan             | 3 (4.5%)               | 3 (3.9%)                   | 1 (2.2%)              | 0.813   |
| Diagnostic test: X-ray or CT scan alone            | 25 (37.9%)             | 1 (1.3%)                   | 0 (0%)                | 0.159   |
| Diagnosis based on symptoms only                   | 1 (1.5%)               | 7 (9.1%)                   | 0 (0%)                | 0.022   |

|                           |          |          |        |       |
|---------------------------|----------|----------|--------|-------|
| Diagnostic test: Not sure | 1 (1.5%) | 4 (5.2%) | 0 (0%) | 0.783 |
| Diagnostic test: other    | 4 (6.1%) | 0 (0%)   | 0 (0%) | 0.260 |
